# Supplementary material
Source: PubMed Central journal article supplement (PMC5658214)

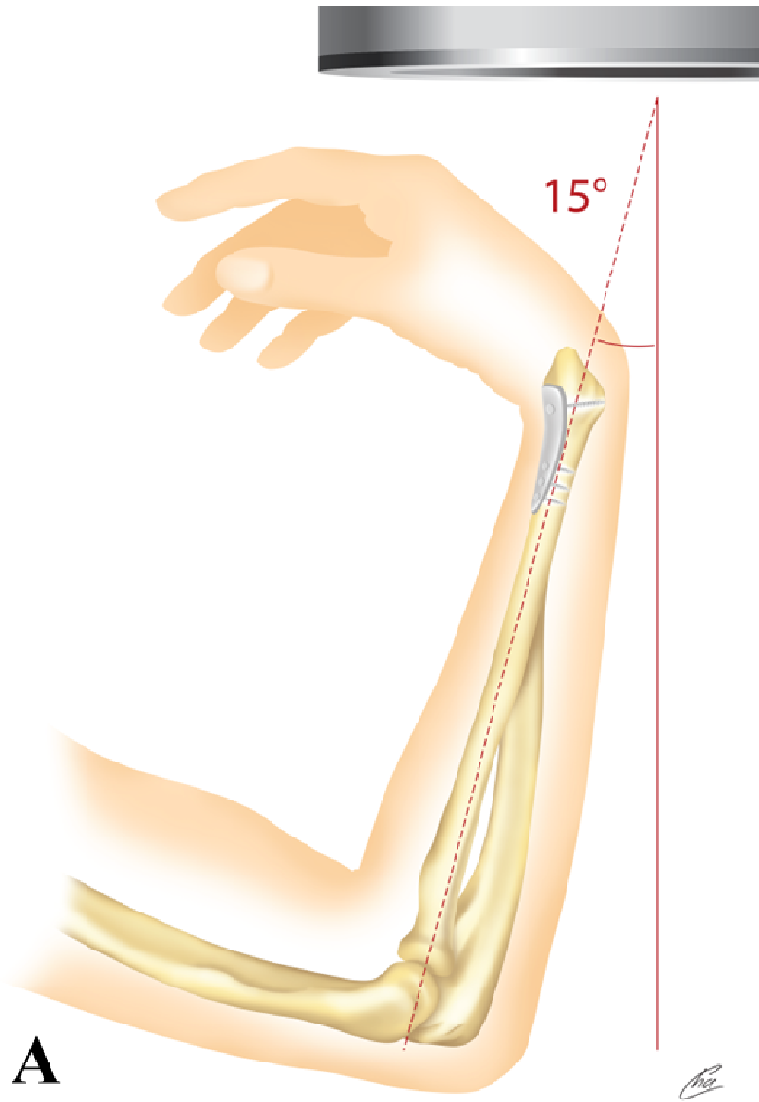

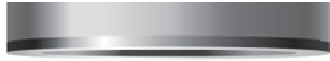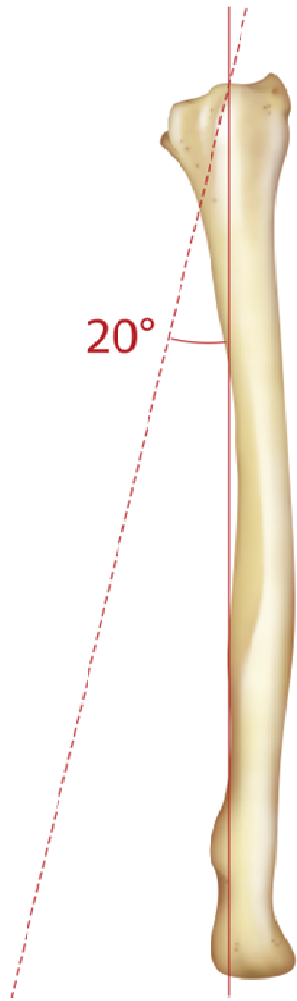

20°

**B**

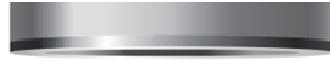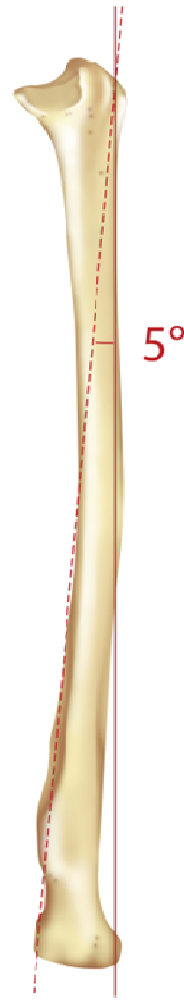

5°

Supplement: 10-1055-s-0037-1603656-s1600128.pdf [file 10-1055-s-0037-1603656-s1600128.pdf]
